# Supplementary material for: Solvent-free hierarchization of zeolites by carbochlorination
Source: Royal Society of Chemistry journal article supplement (doi:10.1039/c6ta09145h), 2016-11-22
Supplement: c6ta09145h1.pdf [file c6ta09145h1.pdf]

## Electronic Supplementary Information (ESI)

### Solvent-free synthesis of hierarchical zeolite Y by carbochlorination

Martin Nichterwitz,<sup>a</sup> Sven Grätz,<sup>a</sup> Winfried Nickel,<sup>a</sup> and Lars Borchardt<sup>a</sup>

<sup>a</sup>Inorganic Chemistry, TU Dresden, Bergstrasse 66, D-01062 Dresden, Germany

|                                      |    |
|--------------------------------------|----|
| S.1 Chlorination temperature .....   | 2  |
| S.2 Carbon Content in Composite..... | 3  |
| S.3 Reaction time .....              | 7  |
| S.4 Chlorine concentration .....     | 9  |
| S.5 Si/Al ratio .....                | 11 |
| S.6 References .....                 | 13 |

## S.1 Chlorination temperature

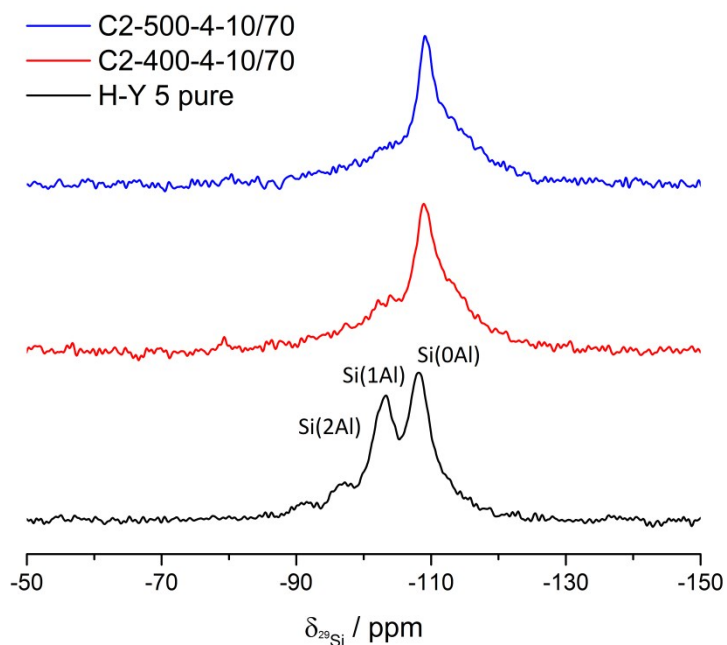

Fig. S1  $^{29}\text{Si}$  CP-MAS NMR spectra of the parent zeolite and composite 2 prepared at 400 and 500 °C. Si(nAl) species have been assigned according to [S1]

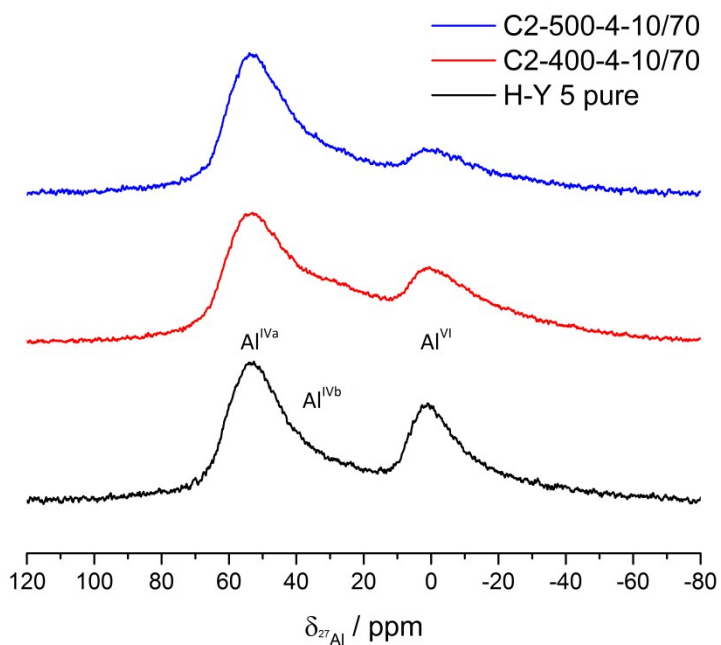

Fig. S2  $^{27}\text{Al}$  CP-MAS NMR spectra of the parent zeolite and composite 2 prepared at 400 and 500 °C. Al species have been assigned according to [S2]

## S.2 Carbon Content in Composite

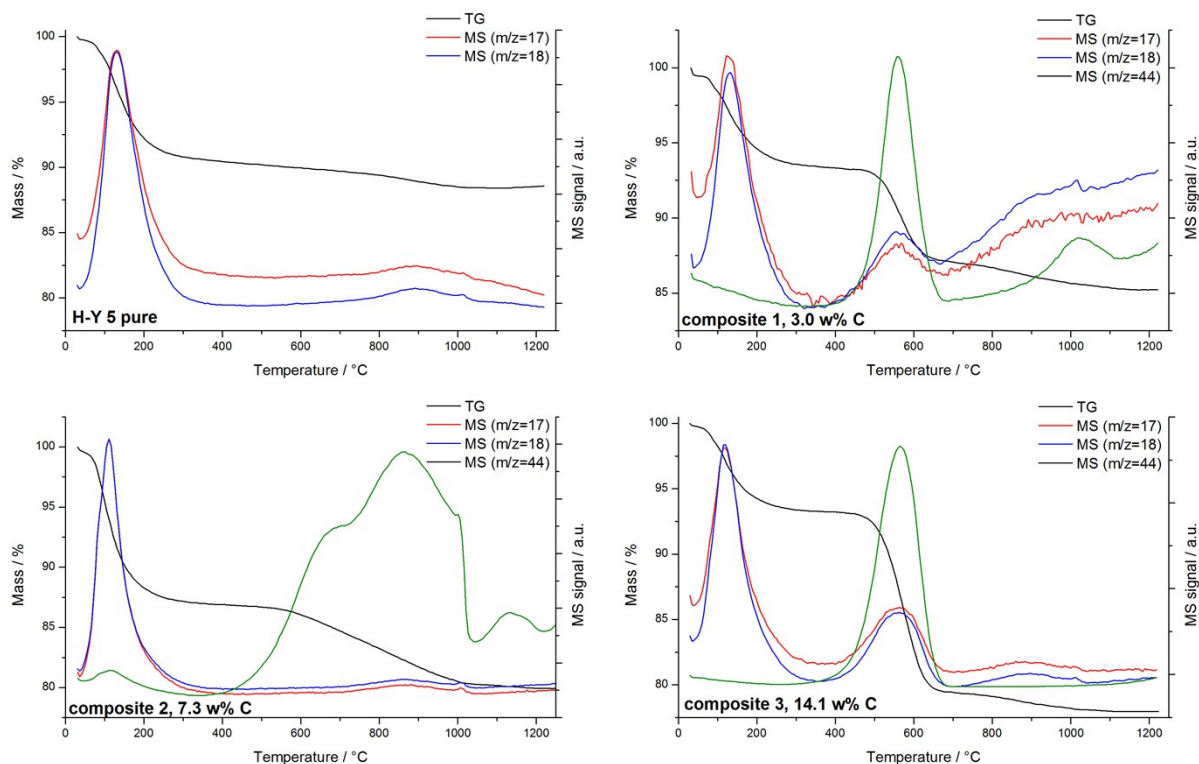

Fig. S3 TG/MS of parent material and all 3 composites with different carbon loadings under synthetic air from 25 to 1250 °C (heating rate 5 K min<sup>-1</sup>)

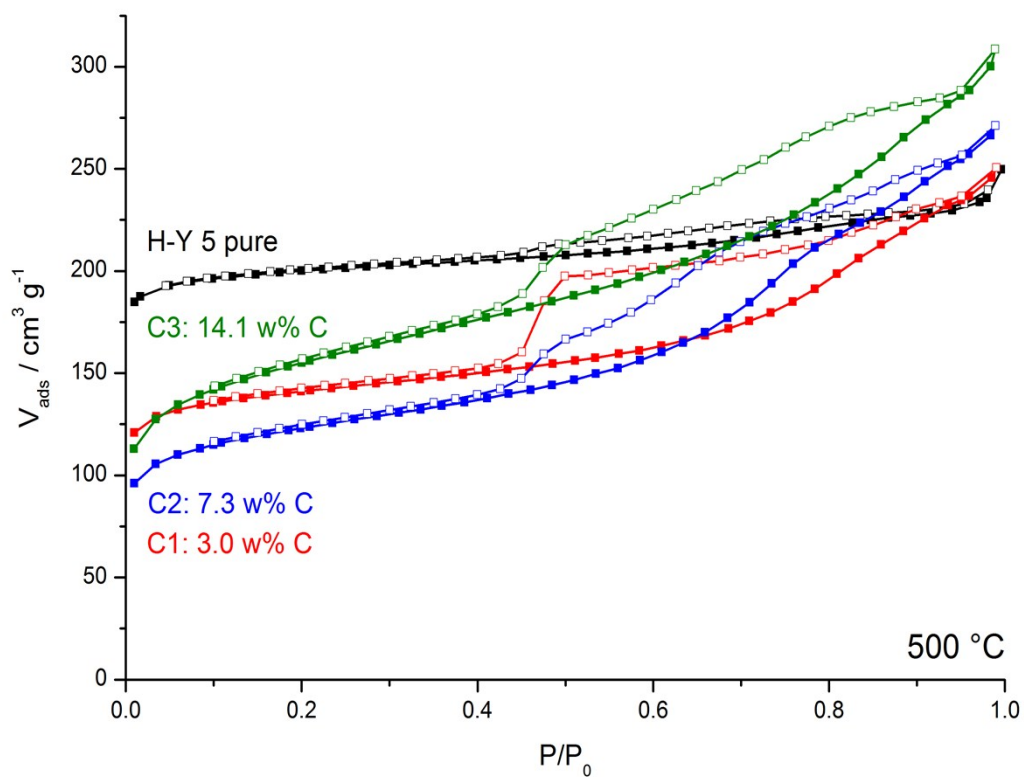

Fig. S4 N<sub>2</sub>-Isotherms at -196 °C of samples at 500 °C from different zeolite-carbon composite red (C1-500-4-10/70), blue (C2-500-4-10/70), green (C3-500-4-10/70)

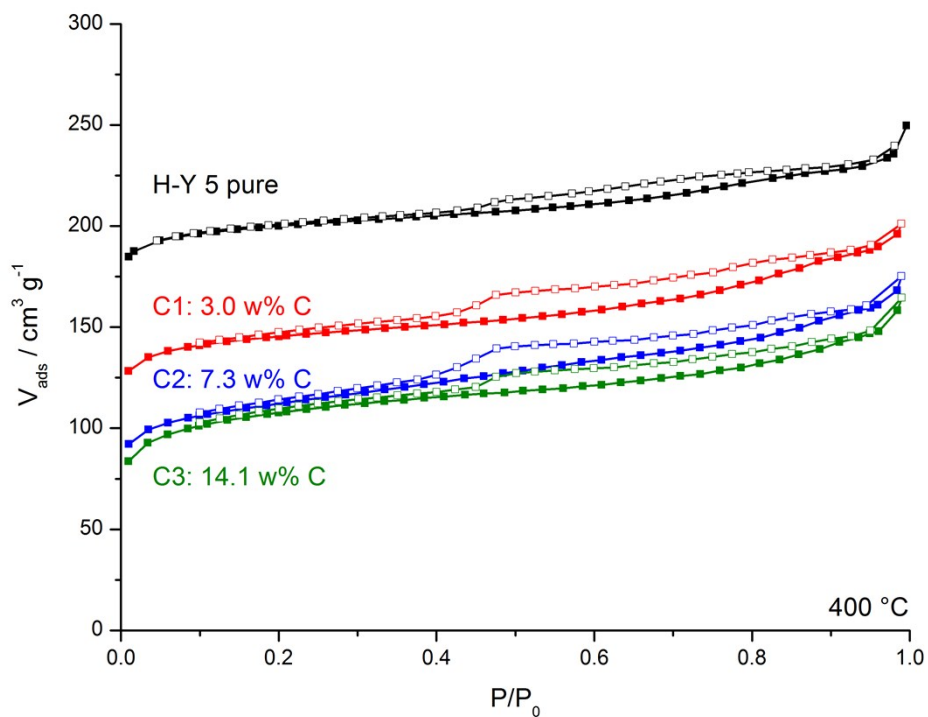

Fig. S5  $N_2$ -adsorption isotherms of parent material and samples with different carbon loadings carbochlorinated at 400 °C

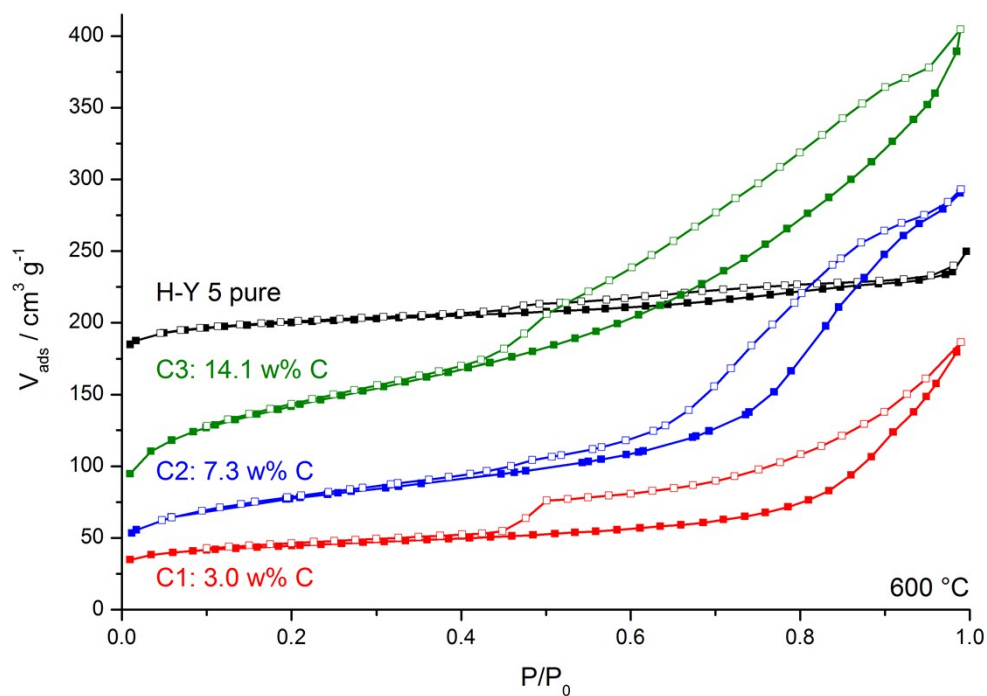

Fig. S6  $N_2$ -adsorption isotherms of parent material and samples with different carbon loadings carbochlorinated at 600 °C

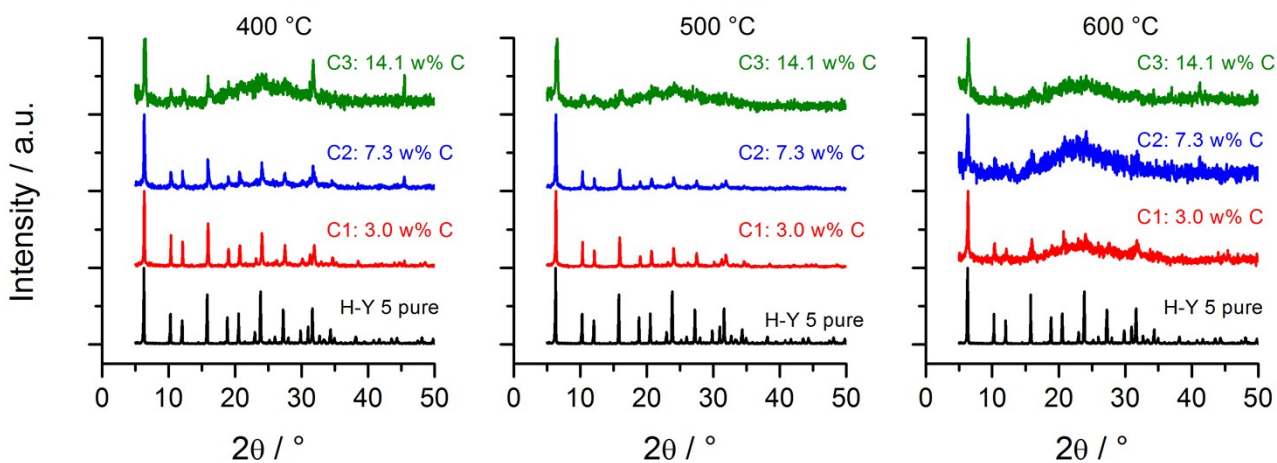

Fig. S7 Powder XRD of carbochlorinated samples with different carbon loadings at 400 °C, 500 °C and 600 °C. Diffractograms are normalized on the main reflex [111] at 6 ° 2θ.

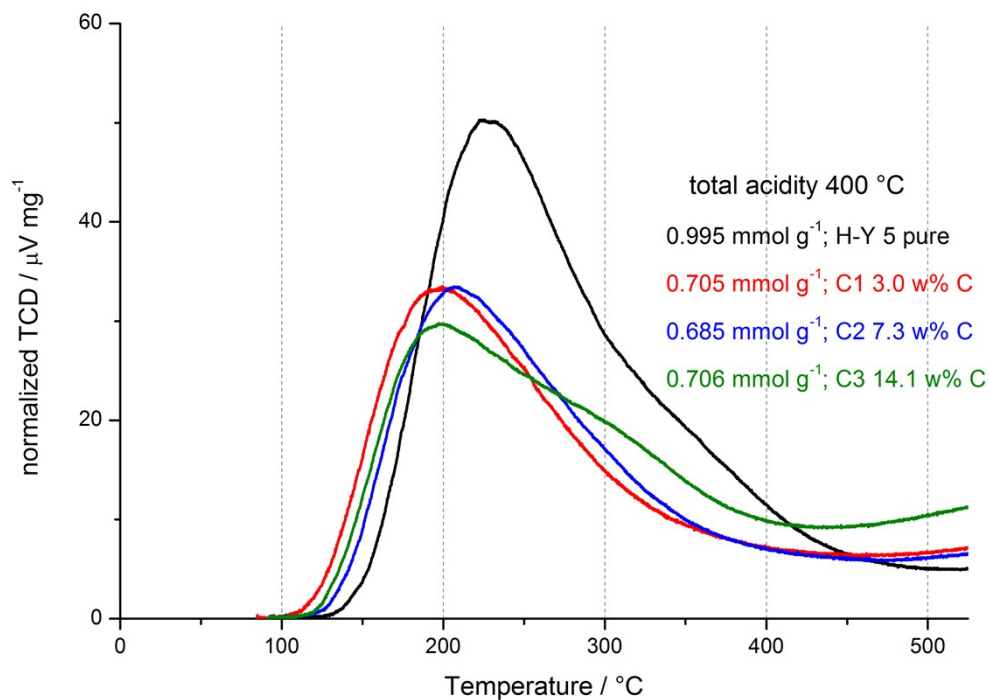

Fig. S8 TPAD of parent material and samples with different carbon loadings carbochlorinated at 400 °C after calcination under air for 6 h at 550 °C.

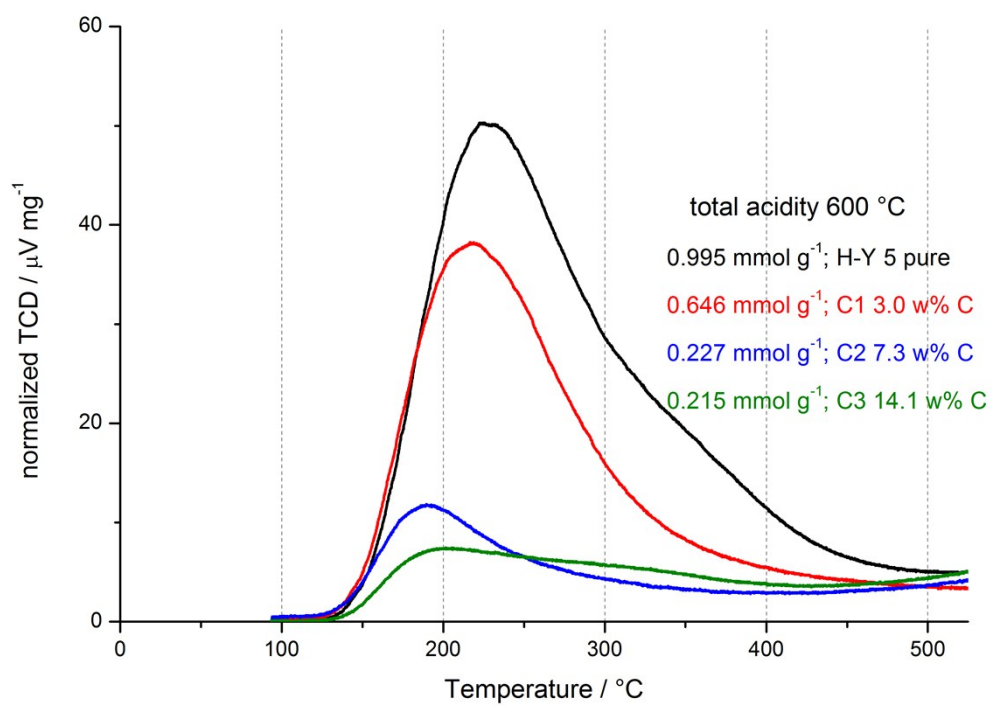

Fig. S9 TPAD of parent material and samples with different carbon loadings carbochlorinated at 600 °C after calcination under air for 6 h at 550 °C.

### S.3 Reaction time

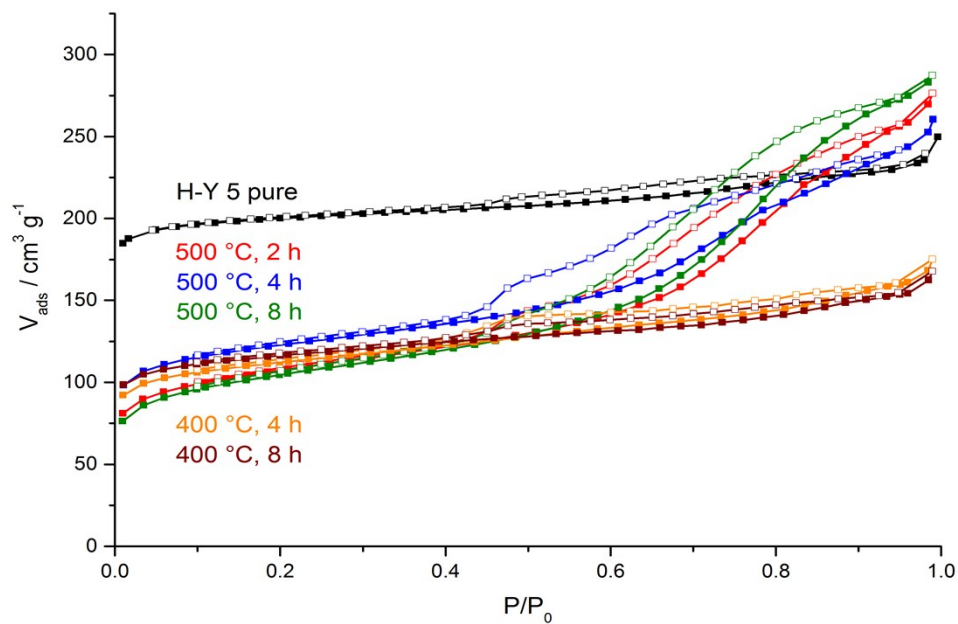

Fig. S10  $\text{N}_2$ -Isotherms at  $-196^\circ\text{C}$  from composite 2 samples at  $400^\circ\text{C}$  and  $500^\circ\text{C}$  with different reaction time

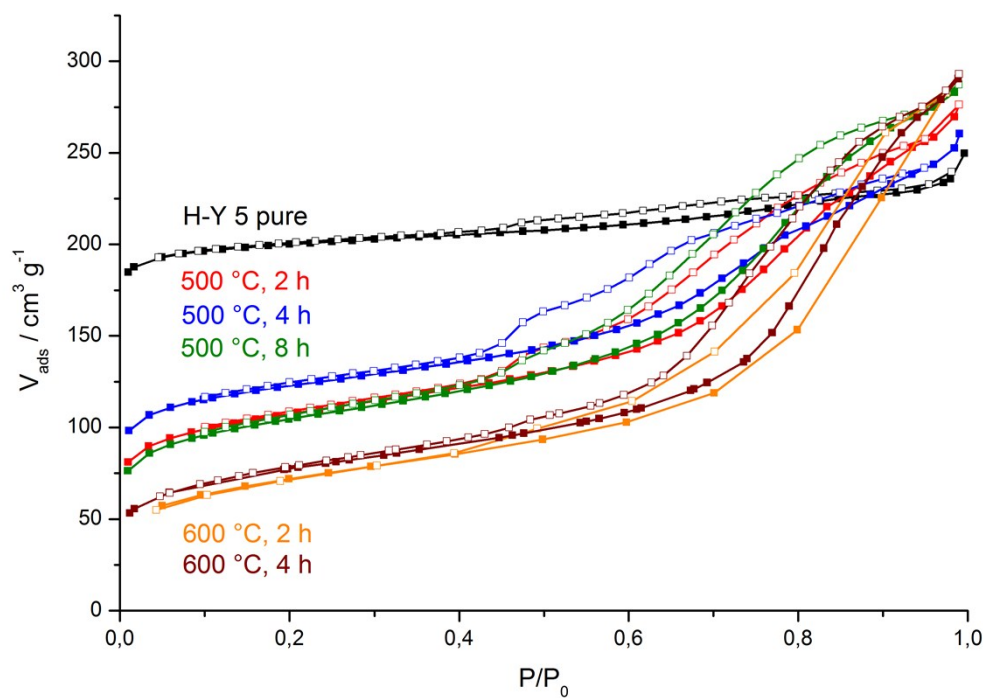

Fig. S11  $\text{N}_2$ -adsorption isotherms of parent material and samples carboclorinated at  $500^\circ\text{C}$  and  $600^\circ\text{C}$  over 2 h, 4 h or 8 h, respectively

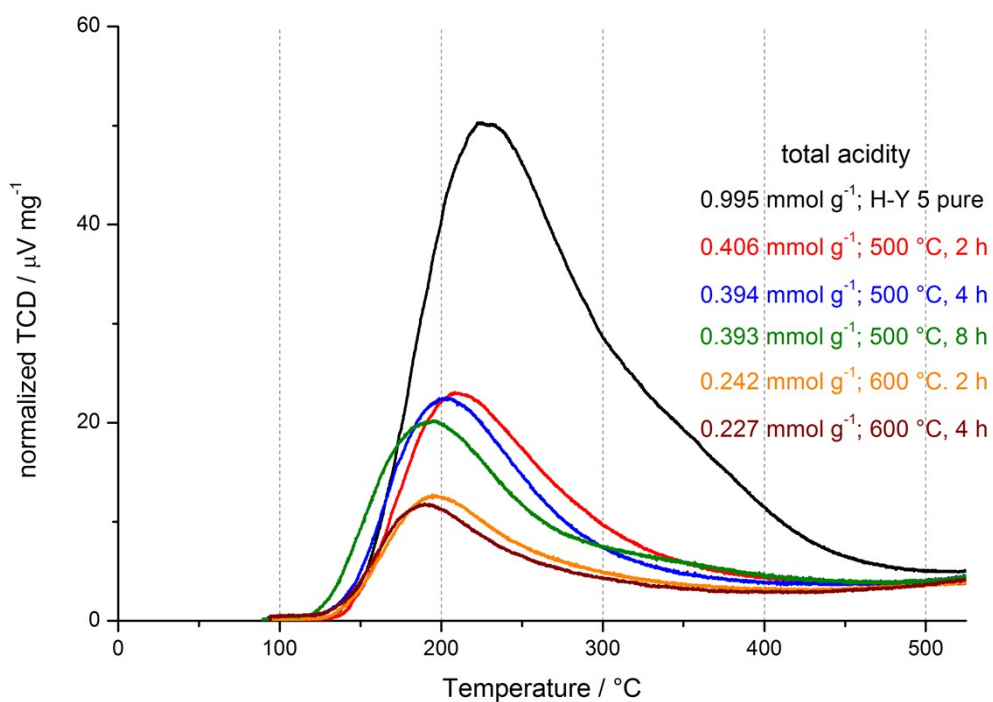

Fig. S12 TPAD of parent material and samples carbobchlorinated at 500°C and 600 °C over 2h, 4 h or 8 h, respectively. Samples were calcinated under air for 6 h at 550 °C.

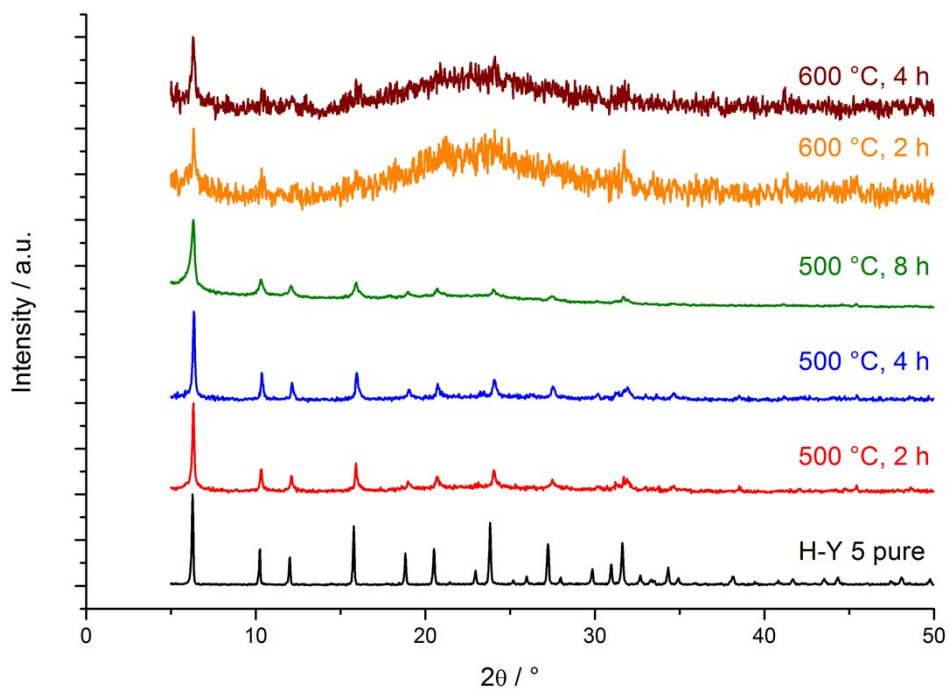

Fig. S13 Powder XRD of parent material and samples carbobchlorinated at 500°C and 600 °C over 2h, 4 h or 8 h, respectively. Diffractograms are normalized on the main reflex [111] at 6 ° 2θ.



## S.4 Chlorine concentration

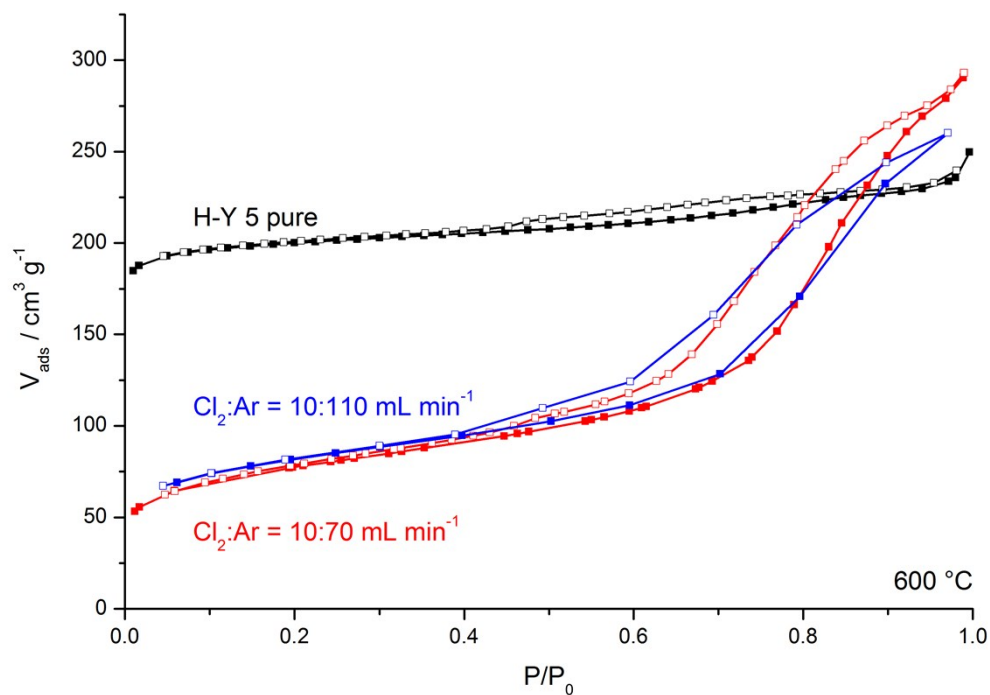

Fig. S14 N<sub>2</sub>-adsorption isotherms of parent material and samples carbochlorinated at 600 °C for 4 h with different chlorine concentrations.

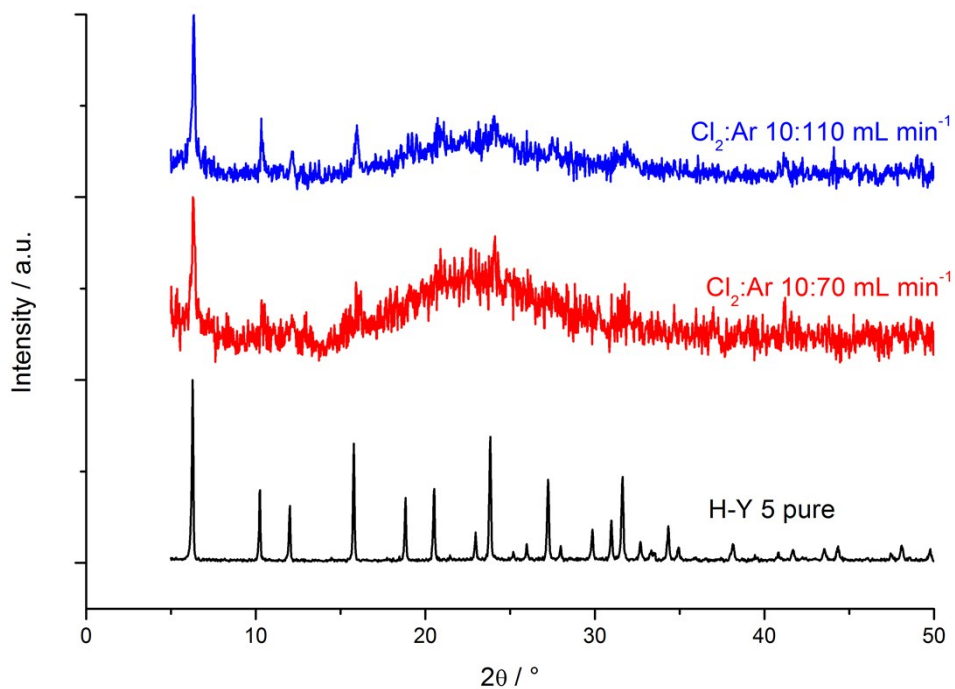

Fig. S15 Powder XRD of parent material and samples carbochlorinated at 600 °C for 4 h with different chlorine concentrations. Diffractograms are normalized on the main reflex [111] at  $6^\circ 2\theta$ .

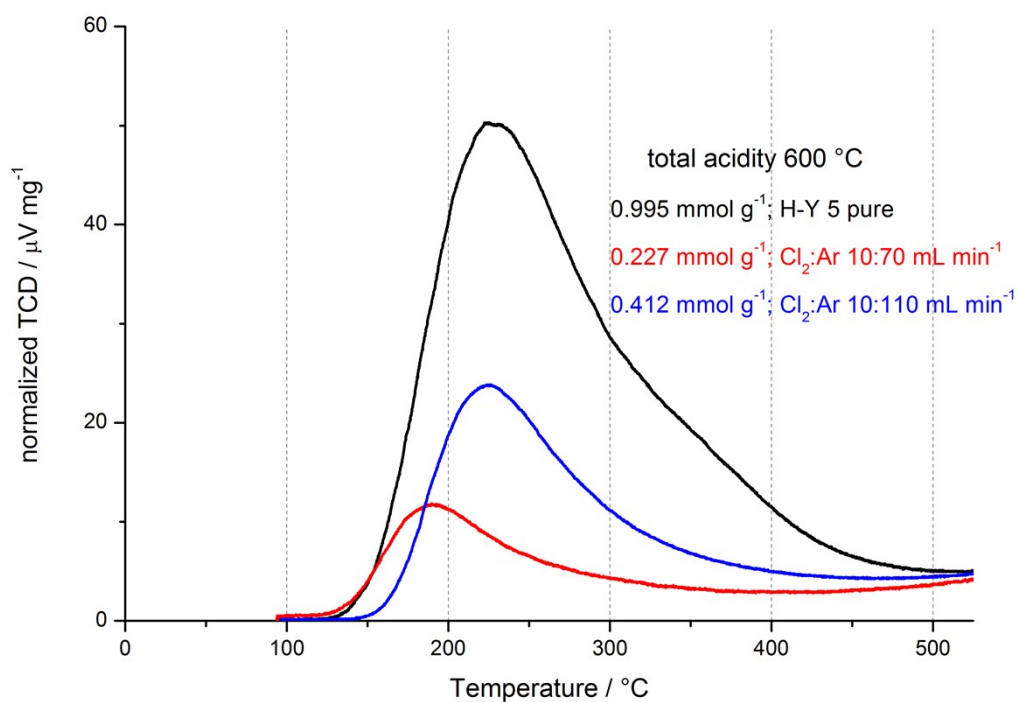

**Fig. S16** TPAD of parent material and samples carbochlorinated at 600 °C for 4 h with different chlorine concentrations. Samples were calcinated under air for 6 h at 550 °C.

**Table S1** characterization data of samples synthesized at 600 °C for different chlorine concentrations. Physisorption data derived from N<sub>2</sub>-isotherms measured at -196 °C.

| Sample <sup>a</sup> | Si/Al <sup>b</sup><br>/ mol mol <sup>-1</sup> | SSA <sub>BET</sub> <sup>c</sup><br>/ m <sup>2</sup> g <sup>-1</sup> | PV <sub>total</sub> <sup>d</sup><br>/ m <sup>3</sup> g <sup>-1</sup> | PV <sub>micro</sub> <sup>e</sup><br>/ m <sup>3</sup> g <sup>-1</sup> | PV <sub>meso</sub> <sup>f</sup><br>/ m <sup>3</sup> g <sup>-1</sup> | HF <sup>g</sup> | C <sub>XRD</sub> <sup>h</sup><br>/ % | Total acidity <sup>i</sup><br>/ mmol g <sup>-1</sup> | C <sub>res</sub> <sup>j</sup><br>/ w% | Yield <sup>k</sup><br>/ w% |
|---------------------|-----------------------------------------------|---------------------------------------------------------------------|----------------------------------------------------------------------|----------------------------------------------------------------------|---------------------------------------------------------------------|-----------------|--------------------------------------|------------------------------------------------------|---------------------------------------|----------------------------|
| H-Y 5 pure          | 3.0                                           | 751                                                                 | 0.43                                                                 | 0.29                                                                 | 0.12                                                                | 0.08            | 100                                  | 0.995                                                | -                                     | -                          |
| C2-600-4-10/110     | 16.0                                          | 287                                                                 | 0.40                                                                 | 0.06                                                                 | 0.34                                                                | 0.08            | 28                                   | 0.412                                                | 1.09                                  | 70.6                       |
| C2-600-4-10/70      | 18.3                                          | 275                                                                 | 0.42                                                                 | 0.05                                                                 | 0.37                                                                | 0.07            | 26                                   | 0.227                                                | 0.71                                  | 72.2                       |

a sample description given in experimental section

b ICP-OES elemental analysis

c Multi-point BET-method

d Total pore volume at p/p<sub>0</sub> = 0.95

e t-plot method p/p<sub>0</sub> from 0.2 to 0.5

f PV<sub>meso</sub> = PV<sub>total</sub> - PV<sub>micro</sub>

g hierarchy factor HF = (PV<sub>micro</sub>/PV<sub>total</sub>) (S<sub>ext</sub>/SSA<sub>BET</sub>)<sup>70</sup>

h % XRD intensity/HY after ASTM 3906-03<sup>69</sup>

i total acidity determined by TPAD

j residual carbon (C<sub>res</sub>) analyzed by TG; C<sub>res</sub> = C<sub>sample</sub> - C<sub>H-Y 5 pure</sub>

k calculated by weighing before and after carbochlorination

## S.5 Si/Al ratio

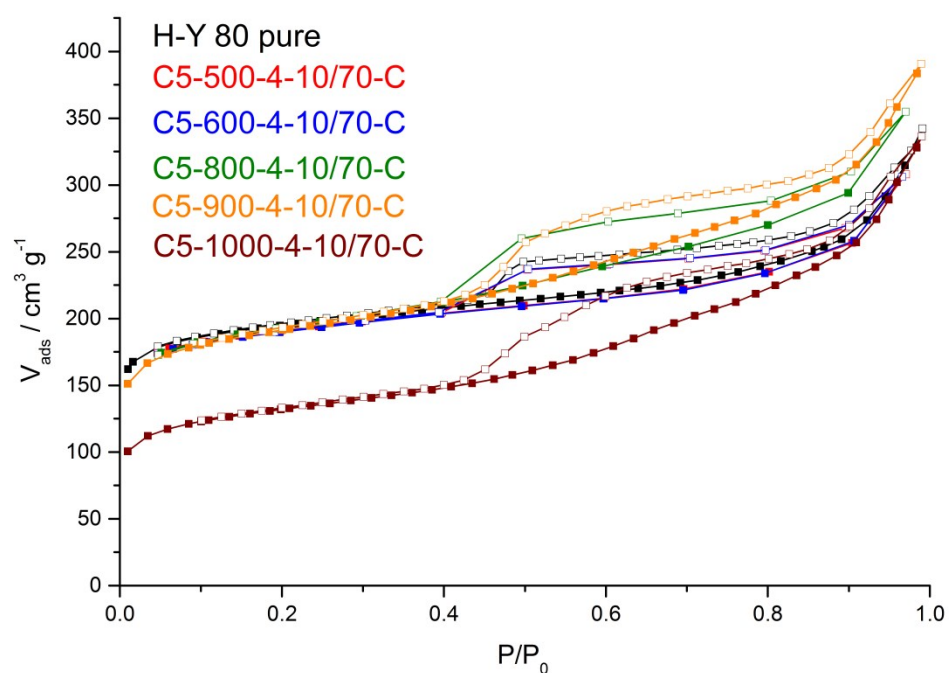

Fig. S17 N<sub>2</sub>-adsorption isotherms of parent material and composite 5 carbochlorinated at different temperatures for 4 h respectively

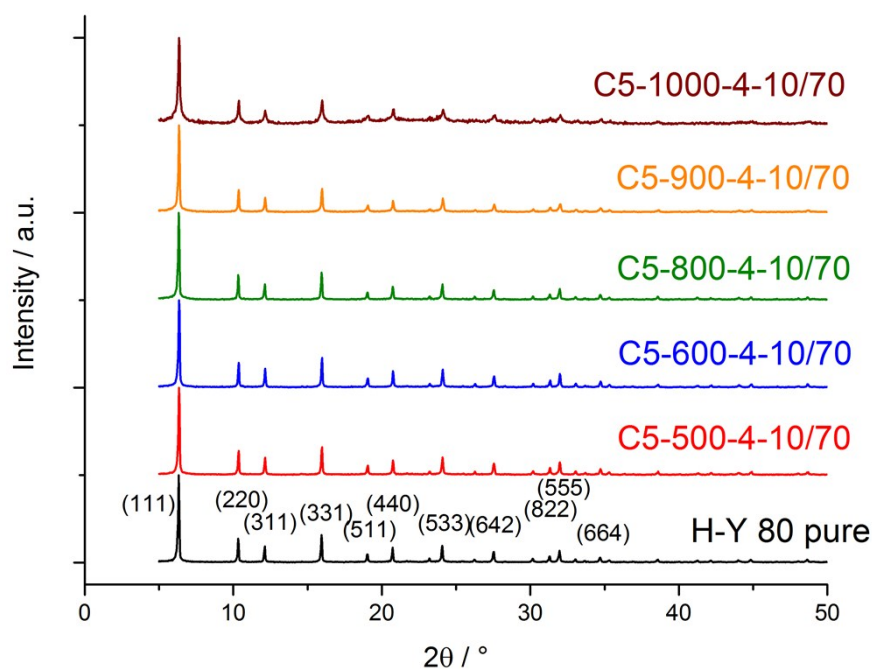

Fig. S18 XRD from composite 5 samples carbochlorinated at different temperatures. Diffractograms are normalized on the main reflex [111] at 6° 2θ.

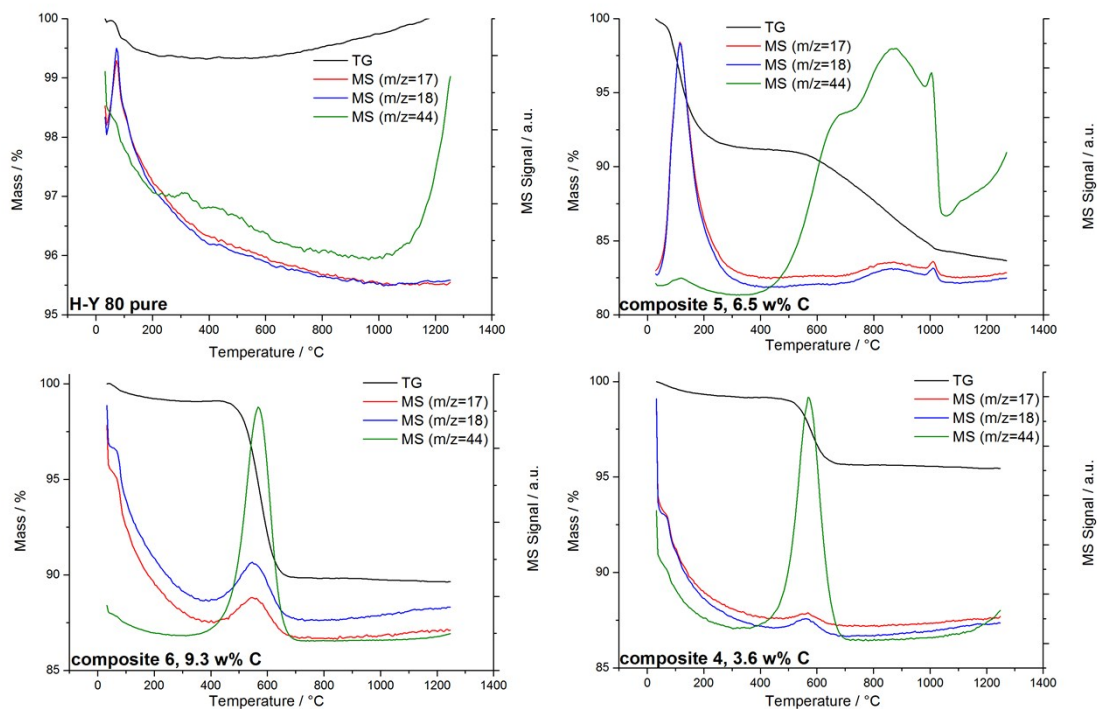

Fig. S19 TG/MS of parent material and all 3 composites with different carbon loadings under synthetic air from 25 to 1250 °C (heating rate 5 K min<sup>-1</sup>)

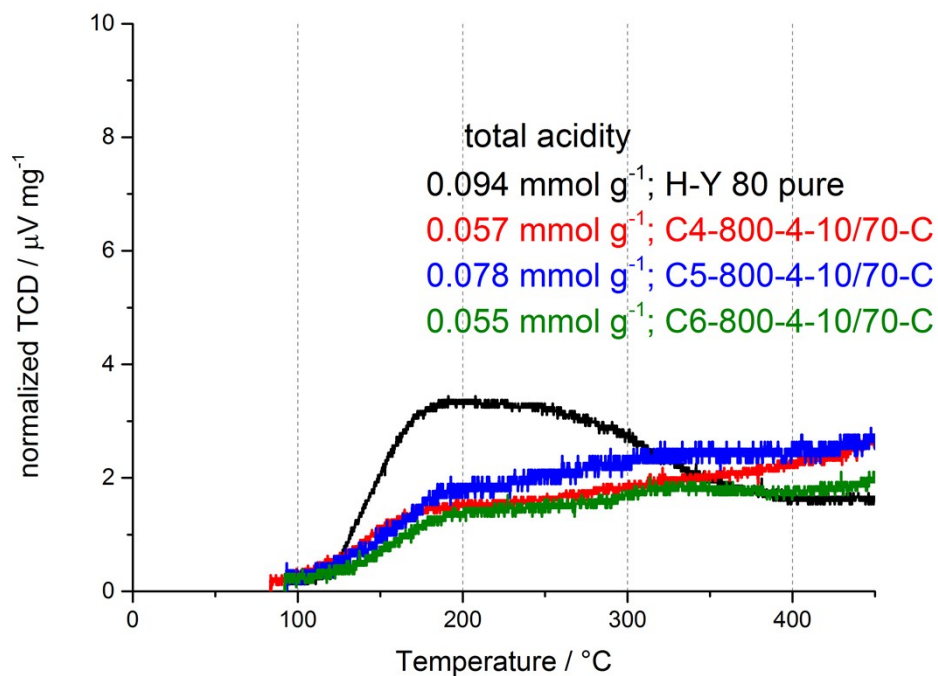

Fig. S20 TPAD of parent material and samples with different carbon loadings carbochlorinated at 800 °C after calcination under air for 6 h at 550 °C.

## S.6 References

[S1] Jiao, J., Wang, W., Sulikowski, B., Weitkamp, J., & Hunger, M. (2006).  $^{29}\text{Si}$  and  $^{27}\text{Al}$  MAS NMR characterization of non-hydrated zeolites Y upon adsorption of ammonia. *Microporous and mesoporous materials*, 90(1), 246-250.

[S2] Van Bokhoven, J. A., Roest, A. L., Koningsberger, D. C., Miller, J. T., Nachtegaal, G. H., & Kentgens, A. P. M. (2000). Changes in structural and electronic properties of the zeolite framework induced by extraframework Al and La in H-USY and La (x) NaY: A  $^{29}\text{Si}$  and  $^{27}\text{Al}$  MAS NMR and  $^{27}\text{Al}$  MQ MAS NMR study. *The Journal of Physical Chemistry B*, 104(29), 6743-6754.
